# Supplementary material
Source: PubMed Central journal article supplement (PMC7788180)
Supplement: ejhpharm-2019-002111supp001.pdf [file ejhpharm-2019-002111supp001.pdf]

## Prevalence of drug interactions in hospitalized elderly patients: a systematic review

Luciana Mello de Oliveira 1,2; Juliana do Amaral Carneiro Diel1; Alessandra Nunes3; Tatiane da Silva Dal Pizzol 1,2,3

1Programa de Pós-Graduação em Epidemiologia, Faculdade de Medicina, Universidade Federal do Rio Grande do Sul.

2Programa de Pós-Graduação em Assistência Farmacêutica, Faculdade de Farmácia, Universidade Federal do Rio Grande do Sul.

3Faculdade de Farmácia, Universidade Federal do Rio Grande do Sul.

Corresponding author: Luciana Mello de Oliveira – [oliveiralm@gmail.com](mailto:oliveiralm@gmail.com) and Tatiane da Silva Dal Pizzol - [tatiane.silva@ufrgs.br](mailto:tatiane.silva@ufrgs.br)

**Supplementary Table 1:** Agency for Healthcare Research and Quality (AHRQ) methodological checklist for cross-sectional/prevalence studies (26).

---

| Item                                                                                                                                |
|-------------------------------------------------------------------------------------------------------------------------------------|
| 1) Define the source of information (survey, record review)                                                                         |
| 2) List inclusion and exclusion criteria for exposed and unexposed subjects (cases and controls) or refer to previous publications  |
| 3) Indicate time period used for identifying patients                                                                               |
| 4) Indicate whether or not subjects were consecutive if not population-based                                                        |
| 5) Indicate if evaluators of subjective components of study were masked to other aspects of the status of the participants          |
| 6) Describe any assessments undertaken for quality assurance purposes (e.g., test/retest of primary outcome measurements)           |
| 7) Explain any patient exclusions from analysis                                                                                     |
| 8) Describe how confounding was assessed and/or controlled.                                                                         |
| 9) If applicable, explain how missing data were handled in the analysis                                                             |
| 10) Summarize patient response rates and completeness of data collection                                                            |
| 11) Clarify what follow-up, if any, was expected and the percentage of patients for which incomplete data or follow-up was obtained |

---
