# Supplementary material
Source: PubMed Central journal article supplement (PMC7788180)
Supplement: ejhpharm-2019-002111supp002.pdf [file ejhpharm-2019-002111supp002.pdf]

## Prevalence of drug interactions in hospitalized elderly patients: a systematic review

Luciana Mello de Oliveira 1,2; Juliana do Amaral Carneiro Diel<sup>1</sup>; Alessandra Nunes<sup>3</sup>; Tatiane da Silva Dal Pizzol 1,2,3

<sup>1</sup>Programa de Pós-Graduação em Epidemiologia, Faculdade de Medicina, Universidade Federal do Rio Grande do Sul.

<sup>2</sup>Programa de Pós-Graduação em Assistência Farmacêutica, Faculdade de Farmácia, Universidade Federal do Rio Grande do Sul.

<sup>3</sup>Faculdade de Farmácia, Universidade Federal do Rio Grande do Sul.

Corresponding author: Luciana Mello de Oliveira – [oliveirm@gmail.com](mailto:oliveirm@gmail.com) and Tatiane da Silva Dal Pizzol – [tatiane.silva@ufrgs.br](mailto:tatiane.silva@ufrgs.br)

**Supplementary Table 2:** Descriptive analysis of the included studies (n=34).

| First author                | Year | Country   | Study design    | Setting                                                       | Population                                                                                                                                                                                                                | n   | Database                                                     | Mean of drugs                   | DDI prevalence (%)                                                                                                  |
|-----------------------------|------|-----------|-----------------|---------------------------------------------------------------|---------------------------------------------------------------------------------------------------------------------------------------------------------------------------------------------------------------------------|-----|--------------------------------------------------------------|---------------------------------|---------------------------------------------------------------------------------------------------------------------|
| Barak-Tsarfir O, et al (58) | 2016 | Israel    | Cohort          | Geriatric rehabilitation ward                                 | Elderly                                                                                                                                                                                                                   | 70  | Drug-Reax System®                                            | N/A                             | 80.5                                                                                                                |
| Blix HS, et al (53)         | 2004 | Norway    | Cross-sectional | Internal medicine and rheumatology units in general hospitals | Patients admitted between May and December, 2002                                                                                                                                                                          | 827 | National Therapy Guidelines and the Norwegian Drug Catalogue | 7154 (mean 8,65 drugs/patient)* | 8.8                                                                                                                 |
| Castilho ECD (27)           | 2018 | Brazil    | Cross-sectional | Public hospital                                               | Patients aged 60 years or older, with diagnosis of a psychiatric disorder, more than one prescribed drug and confirmed availability of medical records with information about drug usage, admitted between 2004 and 2015. | 94  | Drug-Reax System®                                            | median = 5.6                    | 67.0%, 74.5% and 80.8% patients at admission, the median length of stay and at the last prescription, respectively. |
| Chahin RC (46)              | 2015 | Venezuela | Cross-sectional | Internal medicine unit of university hospital                 | Patients aged 60 years or older admitted between June and December, 2015                                                                                                                                                  | 83  | Medscape® Drug Interaction Checker                           | 2-5: 27%; 6-9: 57%; >10: 20%    | 100                                                                                                                 |

|                           |      |          |                 |                                                                            |                                                                                                                                     |      |                                                                                                                                                   |                                                                   |                                                        |
|---------------------------|------|----------|-----------------|----------------------------------------------------------------------------|-------------------------------------------------------------------------------------------------------------------------------------|------|---------------------------------------------------------------------------------------------------------------------------------------------------|-------------------------------------------------------------------|--------------------------------------------------------|
| Correia LM, et al (54)    | 2017 | Portugal | Cross-sectional | Internal medicine unit of public hospital                                  | Patients aged 90 years or older, admitted in 2012                                                                                   | 422  | Epocrates® Interaction Check                                                                                                                      | 5,5 ± 3,1                                                         | NA - DDI was not the main objective of the study       |
| Costa, SC (33)            | 2009 | Brazil   | Cross-sectional | Internal medicine unit of public hospital                                  | Patients aged 60 years or older, admitted in 2006                                                                                   | 149  | Drug-Reax System®; Hansten & Horn's® Drug interactions analysis and management                                                                    | 10 ± 3.4                                                          | 98.6                                                   |
| Cuentro VS (28)           | 2013 | Brazil   | Cross-sectional | Internal medicine, infectology and pneumology wards of University hospital | Patients aged 60 years or older, admitted between 2011 and 2012                                                                     | 258  | Drug-Reax System®                                                                                                                                 | 1762 (6.83 drugs/patient)*                                        | NA - DDI was not the main objective of the study       |
| Danisha P, et al (37)     | 2015 | India    | Cross-sectional | Private hospital                                                           | Patients aged 60 years or older                                                                                                     | 200  | Beers criteria                                                                                                                                    | 8.1                                                               | 100                                                    |
| de Oliveira, LR (42)      | 2013 | Brazil   | Cross-sectional | District hospital                                                          | Patients aged 60 years or older, admitted between January and June, 2010                                                            | 369  | website IM.com.br                                                                                                                                 | N/A                                                               | NA - Number of patients with interaction not provided. |
| Devarapalli P et al (40)  | 2017 | India    | Cross-sectional | Tertiary care hospital                                                     | Patients aged 60 years or older, more than one prescribed drug                                                                      | 135  | Beers criteria                                                                                                                                    | 8.83 ± 0.16                                                       | 43                                                     |
| Doan J, et al (15)        | 2013 | Canada   | Cohort          | Nonsurgical wards of community hospital                                    | Patients aged 65 years or older, with minimum 5 prescription-based oral medications, admitted between September 2010 and March 2011 | 275  | InterMedRx®; FirstDataBank®; Stockley's Drug Interaction (online); Drug-Reax System®; Hansten & Horn's® Drug interactions analysis and management | 13.9 ± 5.3                                                        | 97- 80 (depending on the software used)                |
| dos Santos RM, et al (35) | 2011 | Brazil   | Cross-sectional | Surgical unit of philanthropic hospital                                    | Patients aged 60 years or older admitted between August, 2009 and July, 2010                                                        | 65   | Drug-Reax System®; Stockley's Drug Interactions textbook                                                                                          | 7.20 ± 2.24                                                       | NA - Number of patients with interaction not provided. |
| Egger T, et al (55)       | 2003 | Germany  | Cross-sectional | Geriatric rehabilitation unit                                              | Patients aged 65 years or older, admitted between October, 2011 and February 2002                                                   | 163  | Not defined                                                                                                                                       | 14.0 ± 5.6                                                        | NA - DDI was not the main objective of the study       |
| George AS, et al (38)     | 2018 | India    | Cross-sectional | General and surgical units                                                 | Elderly patients taking at least two medications                                                                                    | 1116 | Drug-Reax System®; Medscape® Drug Interaction Checker; Drugs®; Stockley's Drug Interaction textbook; other sources not defined                    | 6-10: 594 (53.2); 11-15: 210 (18.8); 16-20: 26 (2.3); 20: 3 (0.3) | 59.05                                                  |
| Ghibelli S, et al (56)    | 2013 | Italia   | Cross-sectional | Geriatric units in university hospital                                     | Patients aged 65 years or older, admitted between April and May, 2012                                                               | 74   | Database developed by the Istituto di Ricerche                                                                                                    | 4.1 (0-14)                                                        | 90.54, admission; 87.84, discharge                     |

|                                  |      |         |                 |                                                            |                                                                                                                                         |      |                                                                                                                                   |                      |                                                                                                                                |
|----------------------------------|------|---------|-----------------|------------------------------------------------------------|-----------------------------------------------------------------------------------------------------------------------------------------|------|-----------------------------------------------------------------------------------------------------------------------------------|----------------------|--------------------------------------------------------------------------------------------------------------------------------|
|                                  |      |         |                 |                                                            |                                                                                                                                         |      | farmacologiche Mario Negri                                                                                                        |                      |                                                                                                                                |
| Gutierrez-Valencia M, et al (52) | 2017 | Spain   | Cross-sectional | Geriatric intensive care unit                              | Elderly patients admitted between January and February, 2015                                                                            | 200  | BOT Plus tool®                                                                                                                    | 9.1 ± 4.1            | 82.5                                                                                                                           |
| Jankovic SM, et al (47)          | 2018 | Serbia  | Cohort          | Intensive care unit                                        | Patients admitted between July and December, 2016                                                                                       | 146  | Medscape® Drug Interaction Checker; Epocrates® Interaction Check; Drug-Reax System®                                               | 23.9                 | Using Medscape® Drug Interaction Checker: 99.31<br>Using Epocrates® Interaction Check: 95.89<br>Using Drug-Reax System®: 93.84 |
| Juárez-Cedillo T, et al (42)     | 2016 | Mexico  | Cross-sectional | Tertiary care hospital                                     | Patients aged 70 years or older, admitted for at least 24 hours and receiving more than one medication, between January and April, 2015 | 98   | Stockley's Drug Interactions textbook, Hansten & Horn's® Drug interactions analysis and management; Tatro® Drug Interaction Facts | 6.0 ± 2.69           | 70.41                                                                                                                          |
| Kashyap M, et al (36)            | 2013 | India   | Cohort          | Tertiary care teaching hospital                            | Patients aged 60 years or older                                                                                                         | 1510 | Drug-Reax System®; Stockley's Drug Interaction (online)                                                                           | 9.15 ± 0.03          | 8.34                                                                                                                           |
| Locatelli, J (32)                | 2007 | Brazil  | Cross-sectional | Geriatric unit in private hospital                         | Patients aged 60 years or older, admitted between January, 2006 and January, 2007                                                       | 155  | Drug-Reax System®                                                                                                                 | 13 (2-24)            | NA - Number of patients with interaction not provided.                                                                         |
| Matanovic SM, et al (45)         | 2013 | Croacia | Cross-sectional | Internal medicine unit of university hospital              | Patients aged 65 years or older                                                                                                         | 454  | New screening tool; Beers criteria                                                                                                | 6.1 ± 2.9            | 32.82                                                                                                                          |
| Melo DO, et al (33)              | 2015 | Brazil  | Cross-sectional | General medicine ward of university hospital               | Patients aged 60 years or older, admitted between March and August, 2006                                                                | 316  | Drug-Reax System®                                                                                                                 | 6.25 ± 2.82          | 78.2                                                                                                                           |
| Mohammed S, et al (39)           | 2017 | India   | Cross-sectional | University hospital                                        | Patients admitted between November, 2015 and April, 2016                                                                                | 44   | Drug-Reax System®; website drugs.com; other textbooks not defined                                                                 | N/A                  | NA - DDI was not the main objective of the study                                                                               |
| Narvekar RS, et al (41)          | 2017 | India   | Cross-sectional | Internal medicine wards of tertiary care teaching hospital | Patients aged 60 years or older, with a hospital stay of at least one day                                                               | 150  | Beers criteria                                                                                                                    | 11.63 (range: 4–29). | NA - DDI was not the main objective of the study                                                                               |
| Parreira RBC (34)                | 2016 | Brazil  | Cohort          | Clinical and surgical units of public hospital             | Patients aged 60 years or older, with a hospital stay of at least 48 hours in January, April and July, 2014                             | 176  | Drug-Reax System®                                                                                                                 | 5.4 ± 2.8            | NA - DDI was not the main objective of the study                                                                               |
| Pedroso, FM (30)                 | 2015 | Brazil  | Cross-sectional | Internal medicine unit of university hospital              | Patients admitted between July and October, 2013                                                                                        | 63   | Drug-Reax System®                                                                                                                 | N/A                  | NA - DDI in elderly was not the main                                                                                           |

|                              |      |           |                 |                                                                          |                                                                          |     |                                                      |           | objective of the study                                      |
|------------------------------|------|-----------|-----------------|--------------------------------------------------------------------------|--------------------------------------------------------------------------|-----|------------------------------------------------------|-----------|-------------------------------------------------------------|
| Sapkota S, et al (48)        | 2011 | Nepal     | Cross-sectional | Internal medicine wards of a tertiary care, university teaching hospital | Patients aged 65 years or older                                          | 305 | Medscape® Drug Interaction Checker;                  | 9.8±3.23  | NA - DDI was not the main objective of the study            |
| Radosevic N, et al (44)      | 2008 | Croatia   | Cross-sectional | Internal medicine wards of university hospital                           | Patients aged 65 years or older                                          | 142 | Beers criteria                                       | N/A       | 25.35                                                       |
| Rafiei H, et al (49)         | 2012 | Iran      | Cross-sectional | Intensive care units                                                     | Patients aged 65 years or older admitted from January 1st, 2011          | 70  | Tatro® Drug Interaction Facts                        | 5.6       | NA - DDI in elderly was not the main objective of the study |
| Rosas-Carrasco O, et al (43) | 2011 | Mexico    | Cross-sectional | Secondary care hospital                                                  | Patients aged 60 years or older                                          | 505 | Drug-Reax System®                                    | 6 ± 2.51  | 62.77                                                       |
| Senín, LD (51)               | 2016 | Spain     | Cross-sectional | Internal medicine unit of private hospital                               | Patients aged 65 years or older, admitted between May and November, 2015 | 60  | BOT Plus 2.0®; Stockley's Drug Interactions textbook | N/A       | 21.67                                                       |
| Schuler J, et al (57)        | 2008 | Austria   | Cross-sectional | Internal medicine units of university hospital                           | Patients aged 75 years or older                                          | 543 | Medis® software                                      | 7.5 ± 3.8 | 65.8                                                        |
| Teka F, et al (50)           | 2016 | Ethiopia  | Cross-sectional | Internal medicine units                                                  | Patients aged 60 years or older, admitted between February and May, 2014 | 140 | Drug-Reax System®                                    | 6 ± 4     | 62.2                                                        |
| Yong TY, et al (59)          | 2012 | Australia | Cross-sectional | University hospital                                                      | Patients aged 65 years or older, admitted in March, 2009                 | 200 | Australian Medicines Handbook                        | N/A       | NA - DDI was not the main objective of the study            |
