# Supplementary material
Source: PubMed Central journal article supplement (PMC7788180)

## Prevalence of drug interactions in hospitalized elderly patients: a systematic review

Luciana Mello de Oliveira 1,2; Juliana do Amaral Carneiro Diel<sup>1</sup>; Alessandra Nunes<sup>3</sup>; Tatiane da Silva Dal Pizzol 1,2,3

<sup>1</sup>Programa de Pós-Graduação em Epidemiologia, Faculdade de Medicina, Universidade Federal do Rio Grande do Sul.

<sup>2</sup>Programa de Pós-Graduação em Assistência Farmacêutica, Faculdade de Farmácia, Universidade Federal do Rio Grande do Sul.

<sup>3</sup>Faculdade de Farmácia, Universidade Federal do Rio Grande do Sul.

Corresponding author: Tatiane da Silva Dal Pizzol - [tatiane.silva@ufrgs.br](mailto:tatiane.silva@ufrgs.br)

**Supplementary Figure 1:** Quality Assessment of the reviewed studies and risk of bias. Items were answered as yes (+), no (-), unclear (U), and not applicable to the study (NA). One study was reported in Persian, and other study was an abstract from scientific meeting; in both cases, it was not possible to fully evaluate the items, and in these cases it was classified as “other”.

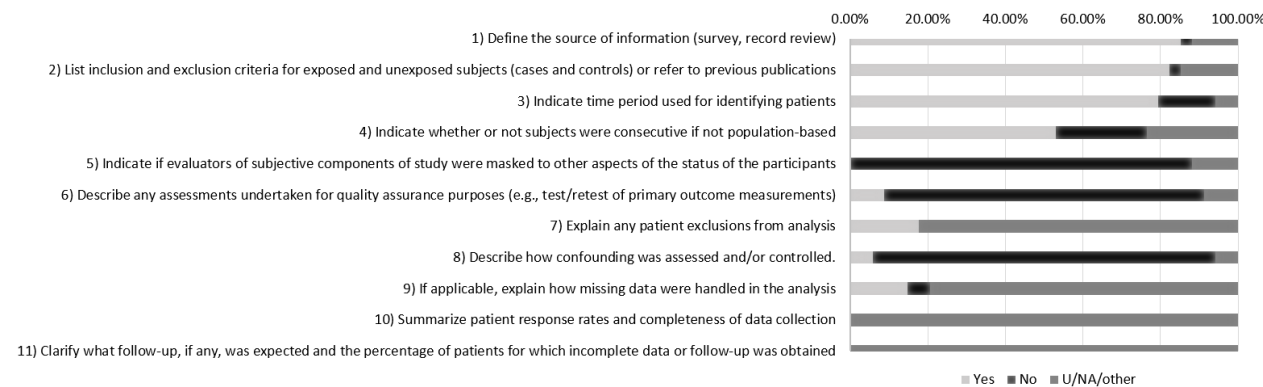

Supplement: ejhpharm-2019-002111supp004.pdf [file ejhpharm-2019-002111supp004.pdf]
